# Supplementary material for: J-aggregation and photodimerisation behaviour of cinnamoyloxy side chains of hyper-branched polymers determined by higher-order derivative spectra
Source: Royal Society of Chemistry journal article supplement (doi:10.1039/c3tc31820f), 2013-10-23
Supplement: c3tc31820f.pdf [file c3tc31820f.pdf]

Supporting information

for

Aggregation and photodimerisation behaviour of cinnamoyloxy side chains  
of hyper-branched polymers determined by higher-order derivative spectra

Kunihiro Ichimura

Faculty of Science, Toho University, 2-2-1 Miyama, Funabashi, Chiba 274-8510

<sup>a</sup> Present address: R & D centre, Murakami Co. Ltd., 1-6-12 Ohnodai, Midori-ku,  
Chiba 267-0056 Japan. E-mail: [k\\_ichimura@murakami.co.jp](mailto:k_ichimura@murakami.co.jp).

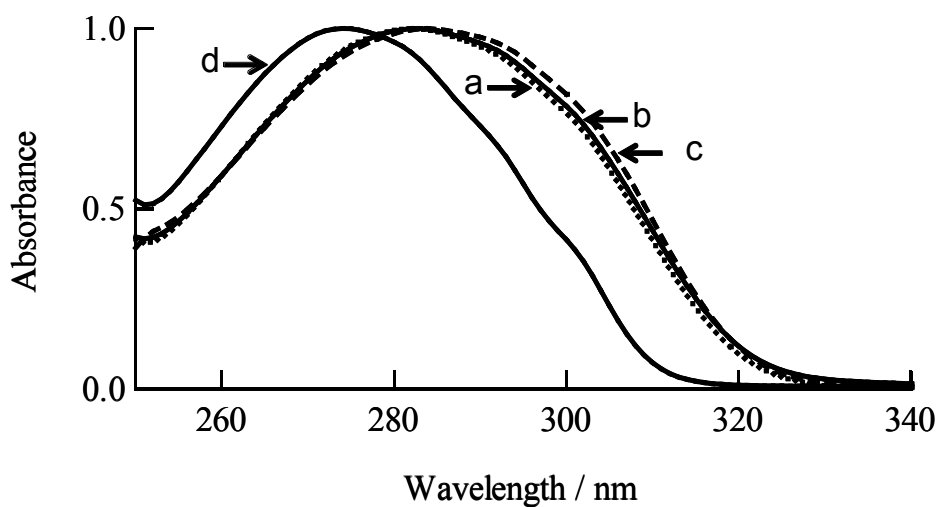

**Fig. S1** Absorption spectra of DCi30 (a; dotted line), DCi20 (b; solid line), DCi40 (c; broken line) and DCi40-CI (d; solid line) in ethyl acetate.

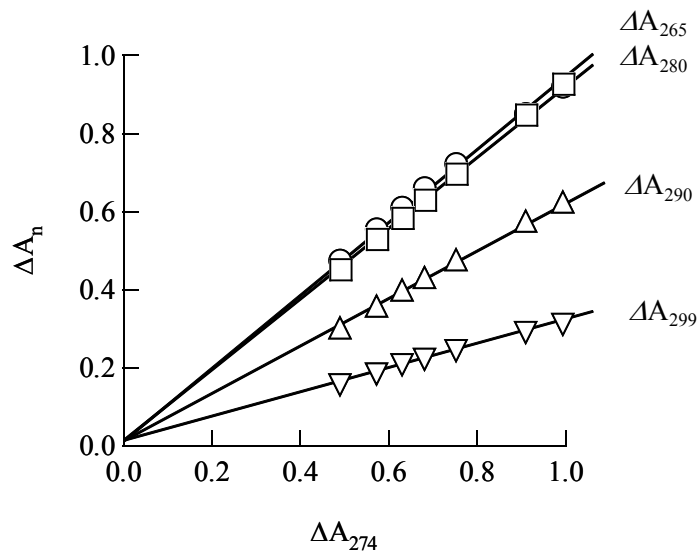

**Fig. S2** ED-diagrams for spectral changes of a dilute solution of EtCi in ethyl acetate upon exposure to 313 nm light.

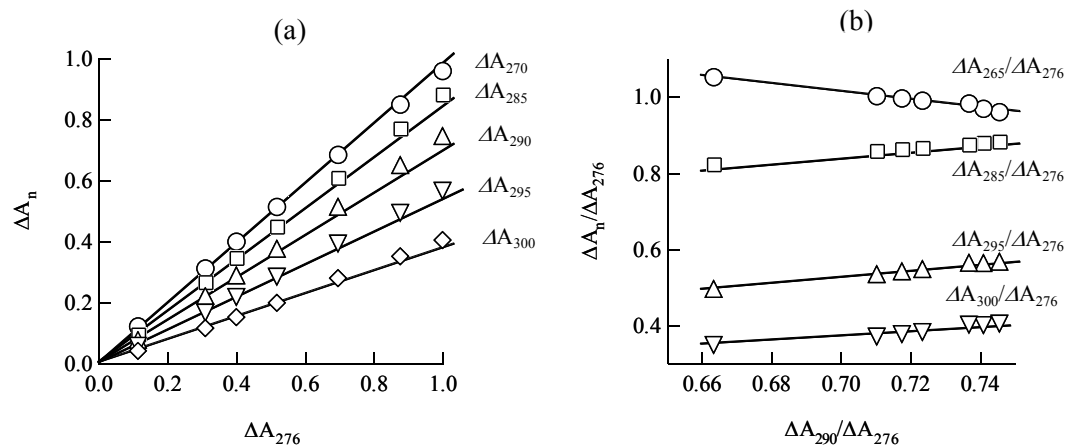

**Fig. S3** (a) ED- and (b) EDQ-diagrams for spectral changes of a dilute solution of Bz2Ci in ethyl acetate upon exposure to 313 nm light.

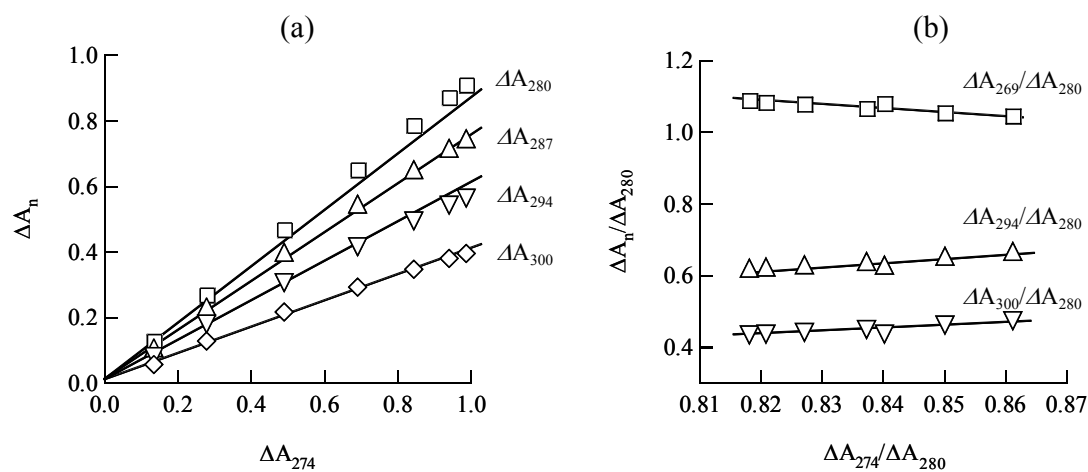

**Fig. S4** (a) ED- and (b) EDQ-diagrams for spectral changes of a dilute solution of PVCi in ethyl acetate upon exposure to 313 nm light.

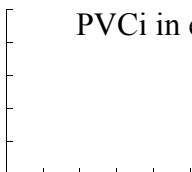

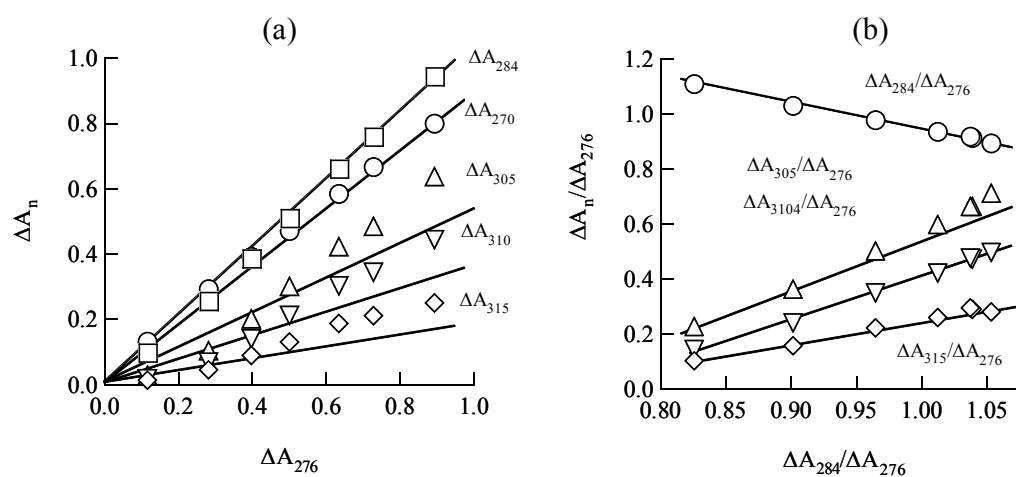

**Fig. S5** (a) ED- and (b) EDQ-diagrams for spectral changes of a dilute solution of DCi40 in ethyl acetate upon exposure to 313 nm light.

**Table S1** The sub-peak positions of the cinnamates in derivative spectra of fourth-order.

| Material | State <sup>a)</sup> | $\lambda_{\text{max}}$ / nm | Sub-peak position / nm |       |       |     |       |                       |
|----------|---------------------|-----------------------------|------------------------|-------|-------|-----|-------|-----------------------|
|          |                     |                             | 1                      | 2     | 3     | 4   | 5     | 6                     |
| EtCi     | solution            | 272                         | 266                    | 273   | 283   | 293 | 302.5 | –                     |
| Bz2Ci    | solution            | 276                         | 266                    | 272.5 | 283   | 293 | 304   | –                     |
| PVCi     | solution            | 271                         | 264                    | 273   | 284   | 294 | 304.5 | –                     |
| DCi20    | solution            | 282                         | 261                    | 274   | 284   | 294 | 305   | (317) <sup>b)</sup>   |
| DCi30    | solution            | 282                         | 261                    | 274   | 284   | 294 | 305   | (317) <sup>b)</sup>   |
| DCi40    | solution            | 284                         | 264                    | 274   | 284.5 | 294 | 304.5 | (~ 318) <sup>b)</sup> |
| DCi40-CI | solution            | 274                         | –                      | 273   | 283   | 294 | 304.5 | –                     |
| PVCi     | film                | 274                         | 267                    | 276   | 286   | 295 | 307   | –                     |
| DCi40    | film                | 284                         | 266                    | 275   | 287   | 297 | 309   | 322                   |

a) Solution in ethyl acetate.

b) Data from 8<sup>th</sup> derivative spectra
